# Supplementary material for: Surface dangling bonds are a cause of B-type blinking in Si nanoparticles
Source: Royal Society of Chemistry journal article supplement (doi:10.1039/c4nr06376g), 2014-12-29
Supplement: c4nr06376g1.pdf [file c4nr06376g1.pdf]

# Supporting Information: Surface Dangling Bonds Are a Cause of B-Type Blinking in Si Nanoparticles

Nicholas P. Brawand, Márton Vörös and Giulia Galli

## 1 Bulk Defect Structure

Figure 1 shows the ball and stick representation of the  $P_b$  defect model in bulk silicon. This model is similar to the “A” center in bulk silicon, which is believed to be an oxygen-vacancy complex.<sup>1–3</sup>

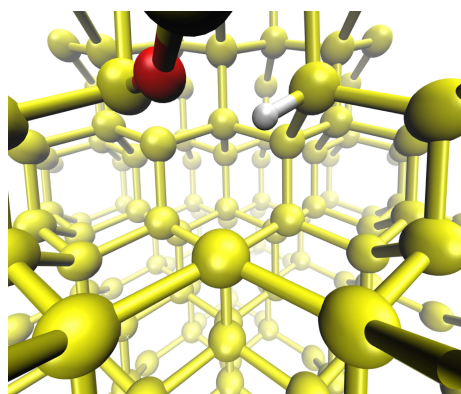

**Fig. 1** Model of the  $P_b$  defect in bulk silicon. The defect was introduced within a 216 silicon atom supercell. Yellow, red and white spheres represent Si, oxygen and hydrogen atoms, respectively.

## 2 Decay Dynamics

Figures 2–4 show possible channels for different initial charge states of a Si nanoparticle with a 1.3 nm diameter and an oxidized layer. The difference in the charge states can be caused by electron exchange with local defects in the surrounding oxide matrix. We assumed the additional holes/electrons were just spectators and do not change the rates. Furthermore, we assumed lifetimes were best represented by calculations where only atoms within the outer most hydrogen shell are relaxed. See figures 2, 3 and 4 below.

## 3 Estimation of Crossing Region

Using a single band effective mass approximation, we can write the activation energy as a function of NP size:

<sup>a</sup> 5747 South Ellis Avenue, Chicago IL 60637, United States. Fax: 773 795 9106; Tel: +1 773 702 0515; E-mail: gagalli@uchicago.edu

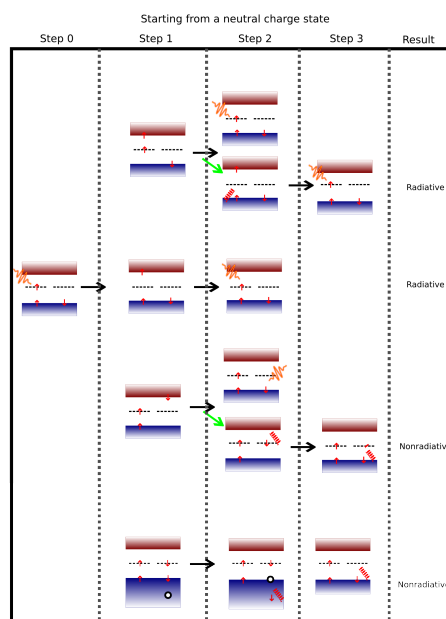

**Fig. 2** Possible decay dynamics of an excited neutral nanoparticle with a dangling bond to the ground state (see text).

$$\begin{aligned}
 E_{act} &= \frac{(E_o - E_{FC})^2}{4E_{FC}} \\
 &= \frac{(E_{Si, gap} - E_{FC} + E_c - E_{FC})^2}{4E_{FC}} \\
 &= \frac{(E_{Si, gap} + \frac{\hbar^2 \pi^2}{2m_c^* R^2} - 2E_{FC})^2}{4E_{FC}}
 \end{aligned}$$

where we have assumed  $E_{FC}$  to be approximately equal to the energy of the defect state from the bulk valence band and independent of NP size. Using the following parameters:

- $m_c^* = 1.09$  Ref.[4]
- $E_{Si, gap} = 1.1$  eV
- $d_{FC} = 0.26$  eV (from the  $1P_b(r_{nm})$  calculation)

we find the nonradiative transition to be more efficient than the radiative for the  $D^+ \rightarrow D^0$  process in NPs with diameters larger than 4 nm in diameter.

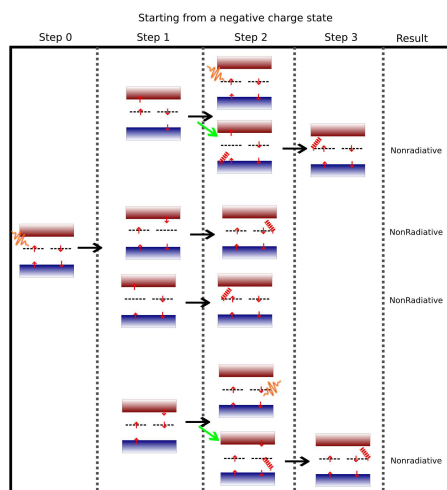

**Fig. 3** Possible decay dynamics a negative nanoparticle system.

## References

- 1 P. Johannesen, B. B. Nielsen and J. R. Byberg, *Phys. Rev. B*, 2000, **61**, 4659.
- 2 J. Coutinho, R. Jones, P. R. Briddon and S. Öberg, *Phys. Rev. B*, 2000, **62**, 10824.
- 3 G. Pfanner, C. Freysoldt, J. Neugebauer and U. Gerstmann, *Phys. Rev. B*, 2012, **85**, 195202.
- 4 M. A. Green, *J. Appl. Phys.*, 1990, **67**, 2944–2954.

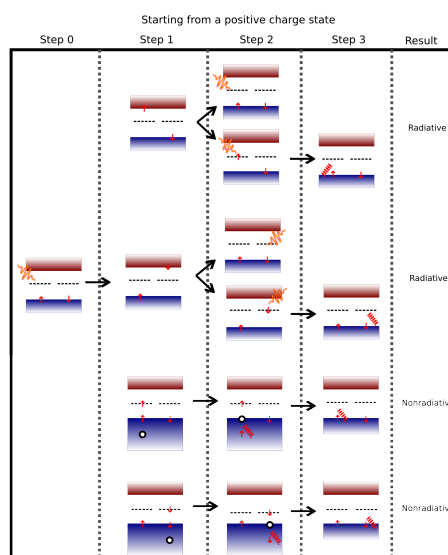

**Fig. 4** Possible decay dynamics a positive nanoparticle system.
